# Supplementary material for: Self-assembly of well-ordered whisker-like manganese oxide arrays on carbon fiber paper and its application as electrode material for supercapacitors
Source: Royal Society of Chemistry journal article supplement (doi:10.1039/c2jm16419a), 2012-01-01
Supplement: c2jm16419a.pdf [file c2jm16419a.pdf]

# Supporting Information

## Self-Assembly of Well-ordered Whisker-like Manganese Oxide Arrays on Carbon Fiber Paper and Its Application as Electrode Materials for Supercapacitors

Yongsong Luo,<sup>a,b,g</sup> Jian Jiang,<sup>a</sup> Weiwei Zhou,<sup>a</sup> Huanping Yang,<sup>a</sup> Jingshan Luo,<sup>a</sup> Xiaoying Qi,<sup>c</sup> Hua Zhang,<sup>c</sup> Denis Y. W. Yu,<sup>b</sup> Chang Ming Li<sup>d,e</sup> and Ting Yu<sup>\*a,b,f</sup>

<sup>a</sup> *Division of Physics and Applied Physics, School of Physical and Mathematical Sciences, Nanyang Technological University, 637371, Singapore*

<sup>b</sup> *Energy Research Institute at Nanyang Technological University, 639789 Singapore*

<sup>c</sup> *School of Materials Science and Engineering, Nanyang Technological University, 639798, Singapore*

<sup>d</sup> *Institute for Clean Energy and Advanced Materials, Southwest University, Chongqing 400700, P. R. China*

<sup>e</sup> *Division of Bioengineering, School of Chemical and Biomedical Engineering, Nanyang Technological University, 637371, Singapore*

<sup>f</sup> *Department of Physics, Faculty of Science, National University of Singapore, 117542 Singapore*

<sup>g</sup> *School of Physics and Electronic Engineering, Xinyang Normal University, Xinyang 464000, P. R. China*

---

\* To whom correspondence should be addressed: E-mail: [yuting@ntu.edu.sg](mailto:yuting@ntu.edu.sg)(T. Yu.).

**Table S1.** Summarization of the supercapacitor performance of different MnO<sub>2</sub> nanocomposites

| Representative nanostructures                           | Specific capacitance                               | Current density /Scan rate                   | Remarks                                                  | Ref.    |
|---------------------------------------------------------|----------------------------------------------------|----------------------------------------------|----------------------------------------------------------|---------|
| MnO <sub>2</sub> nanowhisker arrays on CFP              | 274.1 F g <sup>-1</sup>                            | 0.1 A g <sup>-1</sup>                        | High specific capacitance, excellent cycling performance | Present |
| Graphene oxide/MnO <sub>2</sub>                         | 197.2 F g <sup>-1</sup>                            | 200 mA g <sup>-1</sup>                       | Good electrochemical behaviors                           | 22      |
| Graphene/ MnO <sub>2</sub>                              | 310 F g <sup>-1</sup>                              | 2 mV s <sup>-1</sup>                         | Excellent electrochemical stability                      | 26      |
| Graphene/ MnO <sub>2</sub> -textile                     | 315 F g <sup>-1</sup>                              | 2 mV s <sup>-1</sup>                         | Good rate capability, excellent cycling performance      | 27      |
| Co <sub>3</sub> O <sub>4</sub> @MnO <sub>2</sub> arrays | 480 F g <sup>-1</sup>                              | 2.67 A g <sup>-1</sup>                       | Good cycle performance, remarkable rate capability       | 46      |
| MnO <sub>2</sub> nanorod arrays                         | 660.7 F g <sup>-1</sup><br>485.2 F g <sup>-1</sup> | 10 mV s <sup>-1</sup><br>3 A g <sup>-1</sup> | Good cycling stability, excellent specific capacitance   | 51      |
| MnO <sub>2</sub> /carbon nanotubes                      | 162.2 F g <sup>-1</sup>                            | 200 mA g <sup>-1</sup>                       | Best electrochemical capacitive performance              | 52      |
| Carbon nanotube sheet/MnO <sub>x</sub>                  | 1250 F g <sup>-1</sup>                             | 1 A g <sup>-1</sup>                          | High specific capacitance                                | 53      |

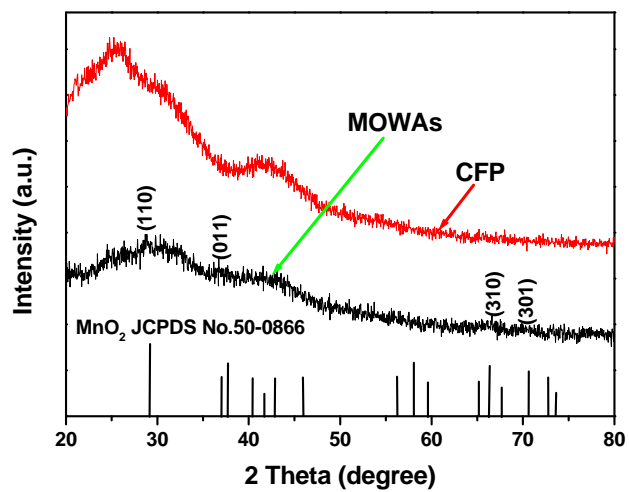

**Fig. S1** XRD pattern of the well-ordered MOWAs and the pristine CFP.

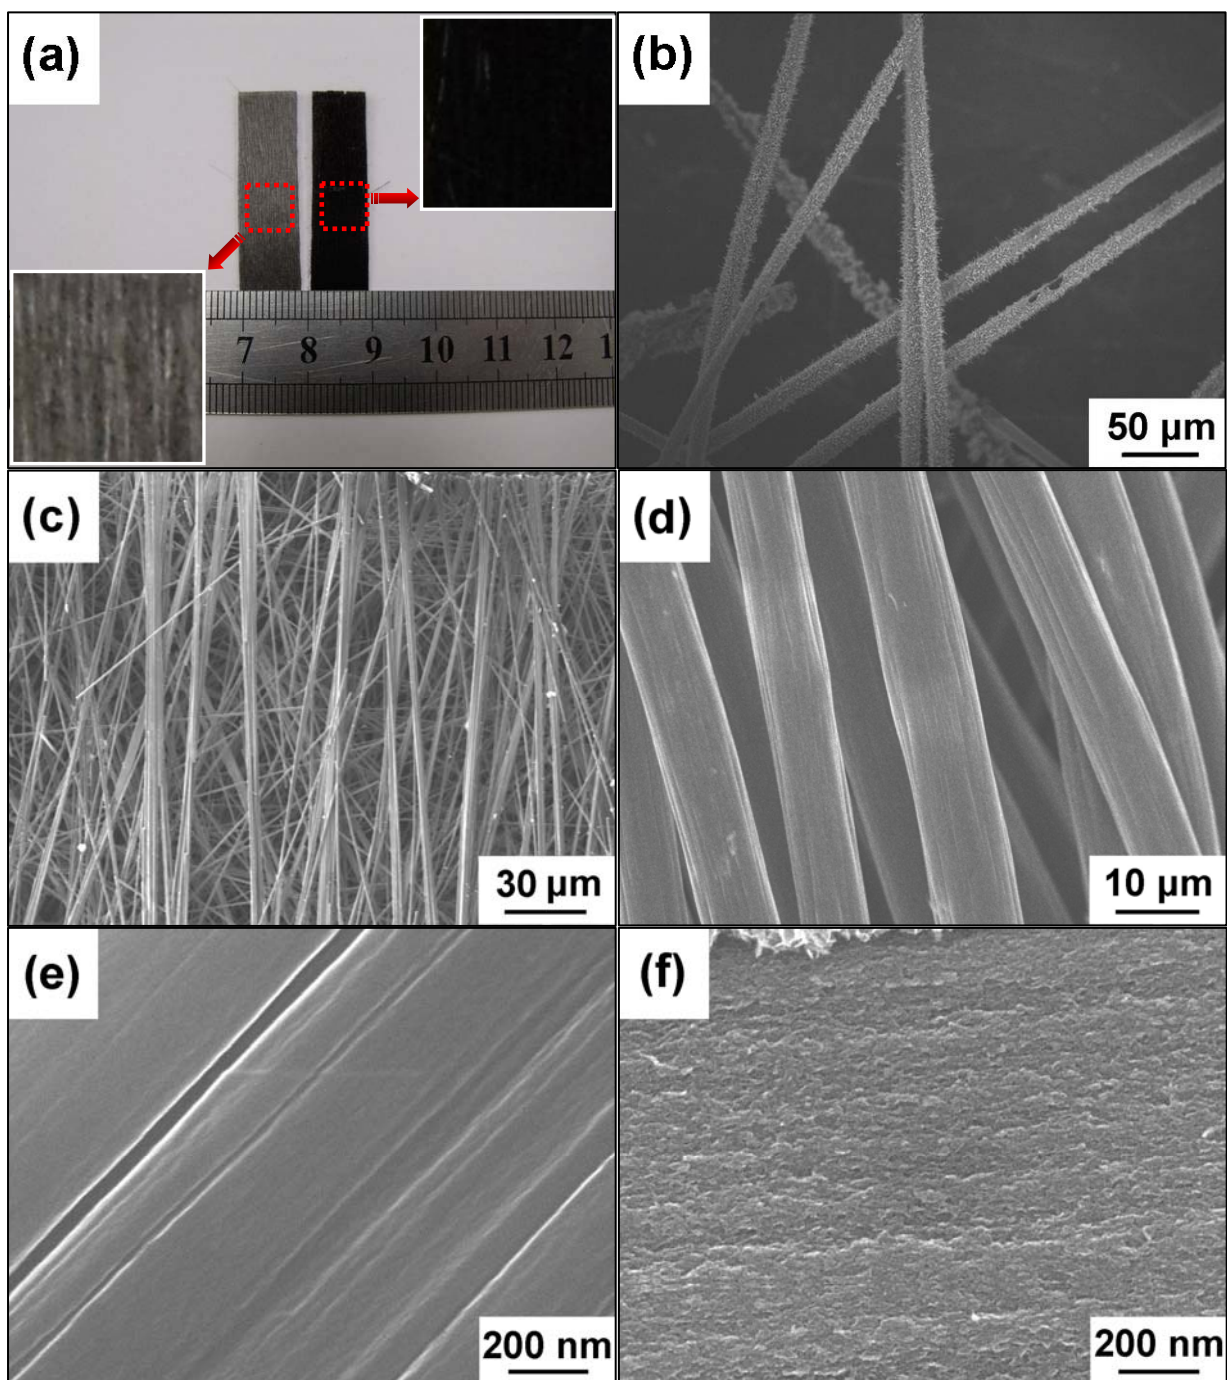

**Fig. S2** (a) Optical images of two pieces of samples before and after hydrothermal reaction (Enlarged image of the area marked by a rectangle); (b) Low-magnification SEM image of MOWAs; (c-e) SEM images of pristine CFP at various magnifications; (f) High-magnification SEM image of CFP after hydrothermal reaction.

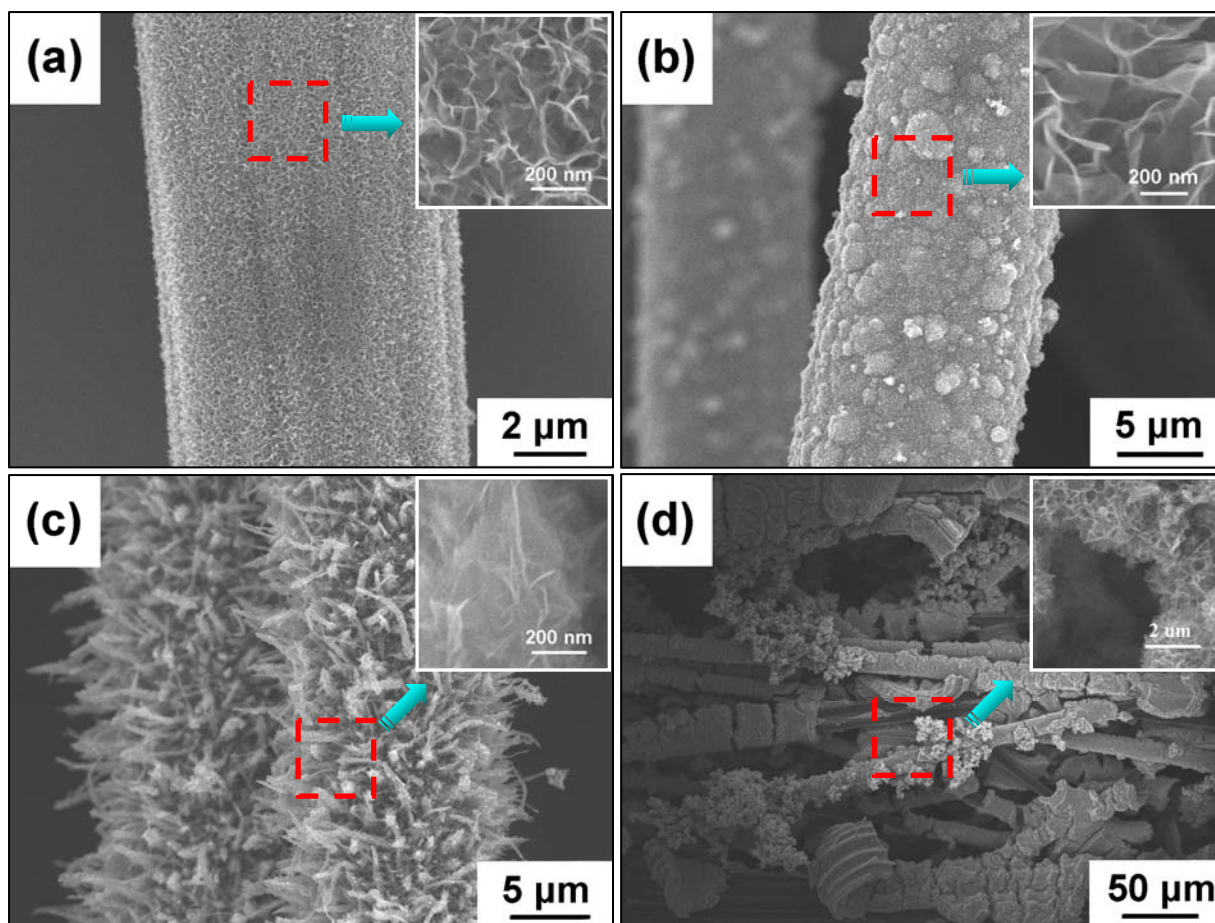

**Fig. S3** (a) SEM image of MOCSs; (b) SEM image of MOCSs with few plumules; (c) SEM image of MOWAs; (d) SEM image of I-MOCSs.

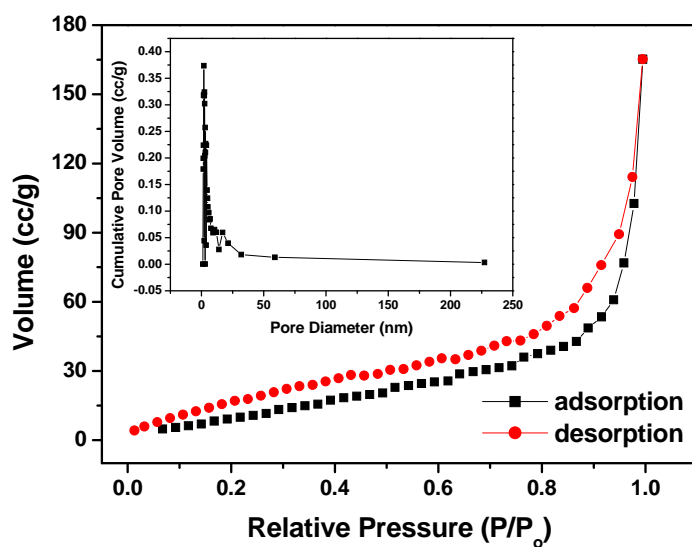

**Fig. S4** Nitrogen adsorption-desorption and pore-size distribution isotherm for the obtained MOWAs products.
